# Supplementary material for: Effects of protein species and surface physicochemical features on the deposition of nanoparticles onto protein-coated planar surfaces
Source: Royal Society of Chemistry journal article supplement (doi:10.1039/c6ra13508k), 2016-01-01
Supplement: c6ra13508k1.pdf [file c6ra13508k1.pdf]

## Supporting Information

### **Effects of protein species and surface physicochemical features on the deposition of nanoparticles onto protein-coated planar surfaces**

Kaoru Ikuma<sup>1,2</sup>, Zhiwei Shi<sup>3</sup>, Amy V. Walker<sup>3</sup>, Boris L. T. Lau<sup>1,4\*</sup>

<sup>1</sup>Department of Geology, Baylor University, Waco, TX 76798

<sup>2</sup>Department of Civil, Construction and Environmental Engineering, Iowa State University, Ames, IA 50011

<sup>3</sup>Department of Materials Science & Engineering, University of Texas at Dallas, Richardson, TX 75080

<sup>4</sup>Department of Civil & Environmental Engineering, University of Massachusetts Amherst, Amherst, MA 01003

\*Corresponding author. E-mail: borislau@engin.umass.edu

**Number of pages:** 9

**Number of tables and figures:** 8

## Figures and Tables

**Table S1.** Positive secondary ion peaks used to determine the amino acid chemistry of the surface-immobilized protein layers. Numbers indicate the unit  $m/z$  ratio of peaks. Relevant peaks were chosen based on Wagner and Castner (2001).<sup>5</sup>

| Amino acid source              | Characteristic Ion                                                                                                                                                                                                  |
|--------------------------------|---------------------------------------------------------------------------------------------------------------------------------------------------------------------------------------------------------------------|
| isoleucine (Ile)/leucine (Leu) | <b>86:</b> C <sub>5</sub> H <sub>12</sub> N <sup>+</sup>                                                                                                                                                            |
| methionine (Met)               | <b>61:</b> C <sub>2</sub> H <sub>5</sub> S <sup>+</sup>                                                                                                                                                             |
| phenylalanine (Phe)            | <b>120:</b> C <sub>8</sub> H <sub>10</sub> N <sup>+</sup> , <b>131:</b> C <sub>9</sub> H <sub>7</sub> O <sup>+</sup>                                                                                                |
| valine (Val)                   | <b>72:</b> C <sub>4</sub> H <sub>10</sub> N <sup>+</sup> , <b>83:</b> C <sub>5</sub> H <sub>7</sub> O <sup>+</sup>                                                                                                  |
| arginine (Arg)                 | <b>43:</b> CH <sub>3</sub> N <sub>2</sub> <sup>+</sup> , <b>73:</b> C <sub>2</sub> H <sub>7</sub> N <sub>3</sub> <sup>+</sup> , <b>100:</b> C <sub>4</sub> H <sub>10</sub> N <sub>3</sub> <sup>+</sup>              |
| asparagine (Asn)               | <b>70:</b> C <sub>3</sub> H <sub>4</sub> NO <sup>+</sup>                                                                                                                                                            |
| glutamine (Gln)                | <b>84:</b> C <sub>4</sub> H <sub>6</sub> NO <sup>+</sup>                                                                                                                                                            |
| glutamic acid (Glu)            | <b>102:</b> C <sub>4</sub> H <sub>8</sub> NO <sub>2</sub> <sup>+</sup>                                                                                                                                              |
| histidine (His)                | <b>81:</b> C <sub>4</sub> H <sub>5</sub> N <sub>2</sub> <sup>+</sup> , <b>82:</b> C <sub>4</sub> H <sub>6</sub> N <sub>2</sub> <sup>+</sup> , <b>105:</b> C <sub>5</sub> H <sub>3</sub> N <sub>3</sub> <sup>+</sup> |

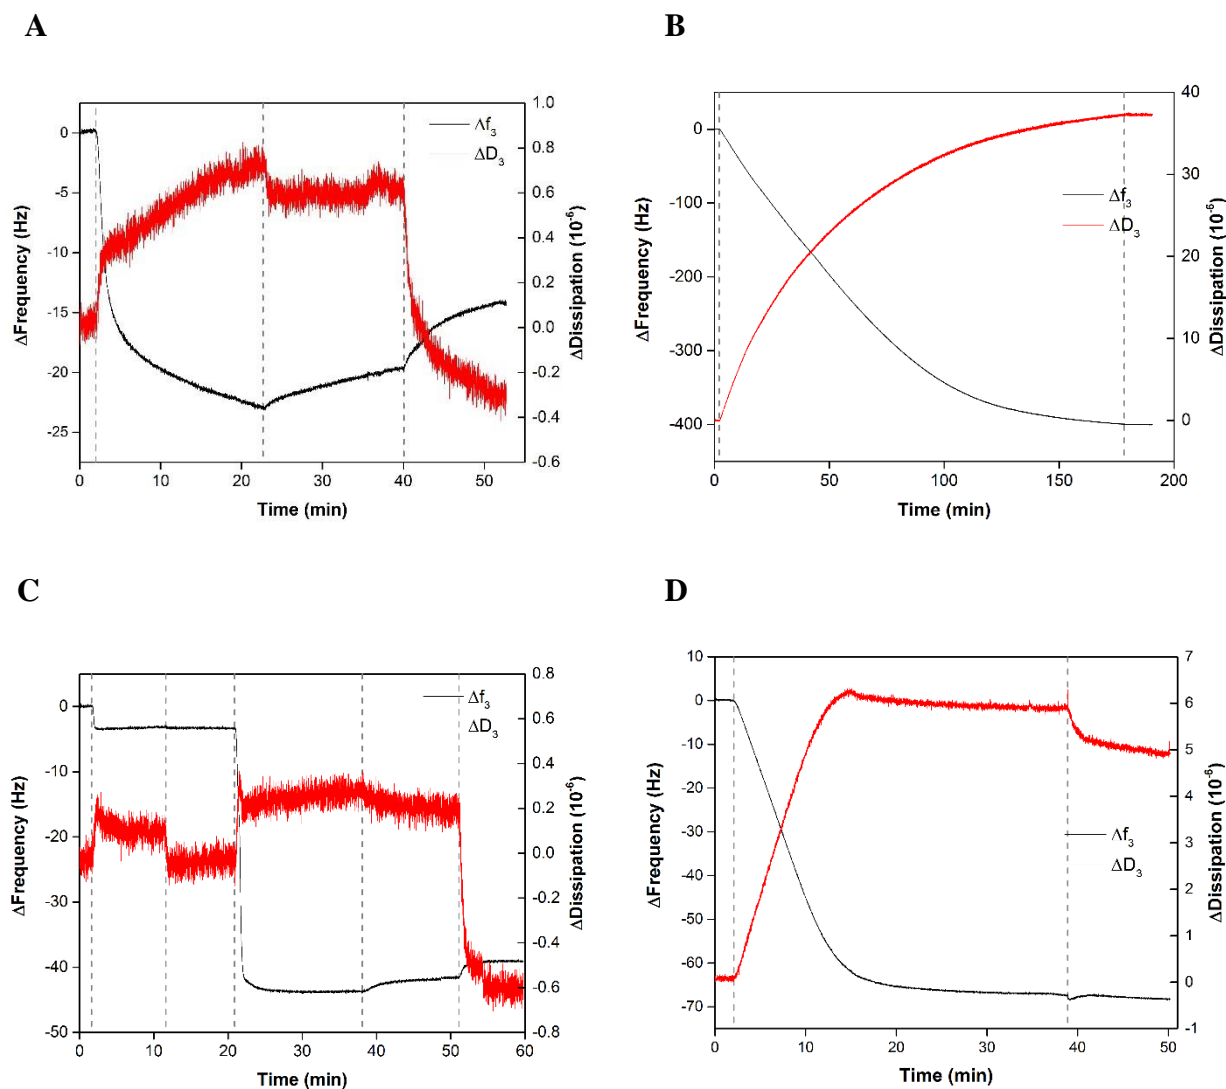

**Figure S1.** Representative third overtone QCM-D data for BSA adsorption followed by hematite NP deposition onto negatively-charged bare silica sensors (BSA adsorption shown in A and hematite NP deposition in B) and positively-charged PLL-precoated silica sensors (PLL and BSA adsorption shown in C and hematite NP deposition in D). The dotted gray lines indicate the time points at which the solutions being flowed through the QCM-D were changed according to the methods (A: 10 mM HEPES, BSA solution, 10 mM HEPES, 10 mM NaCl; B and D: 10 mM NaCl, hematite NP suspension, 10 mM NaCl; C: 10 mM HEPES, PLL solution, 10 mM HEPES, BSA solution, 10 mM HEPES, 10 mM NaCl).

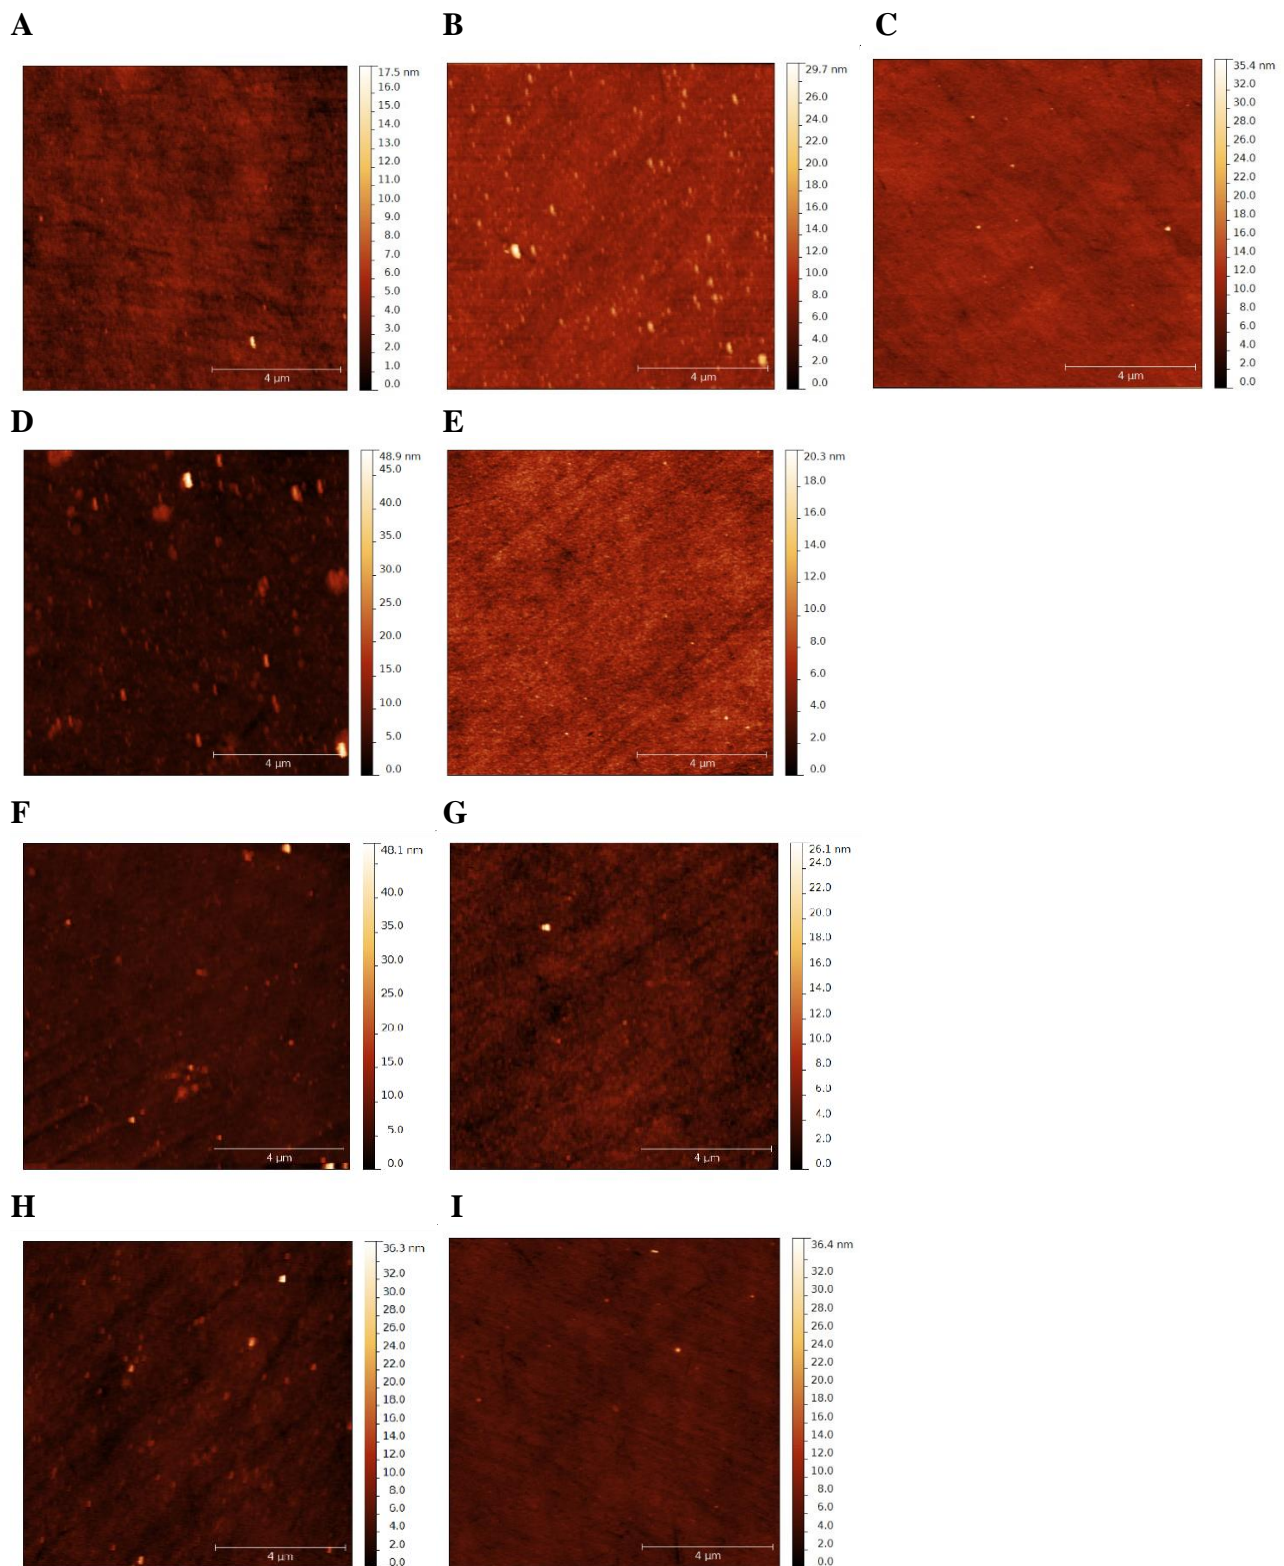

**Figure S2.** Representative AFM surface height images for BSA immobilized on a negatively-charged sensor surface (A) and positively-charged surface (B), lysozyme on a – surface (C), ubiquitin on a – surface (D) and + surface (E), *E. coli* protein extracts on a – surface (F) and + surface (G), and *P. fluorescens* protein extracts on a – surface (H) and + surface (I). The scale bars show 4  $\mu$ m lengths. AFM imaging was performed under dry ambient conditions.

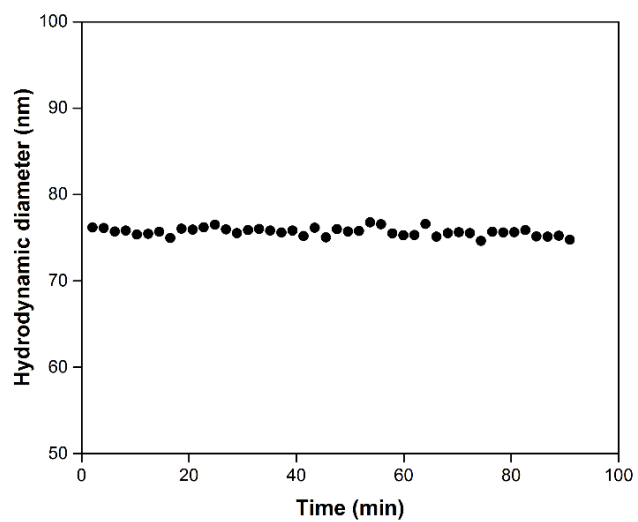

**Figure S3.** Representative hydrodynamic diameters of hematite NPs measured by DLS over the course of a QCM experiment. Hematite NPs were mixed in 10 mM NaCl (pH 5.7) immediately before starting the DLS measurement and QCM flow through.

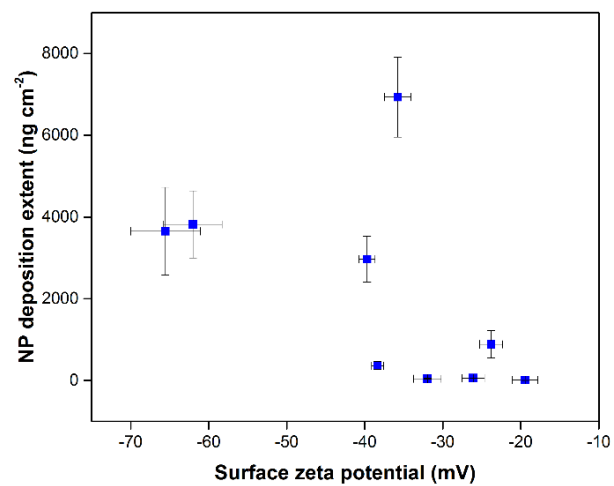

**Figure S4.** Correlations between surface zeta potentials of surface-immobilized protein layers and hematite NP deposition extents. Error bars indicate the standard deviations of at least triplicate measurements.

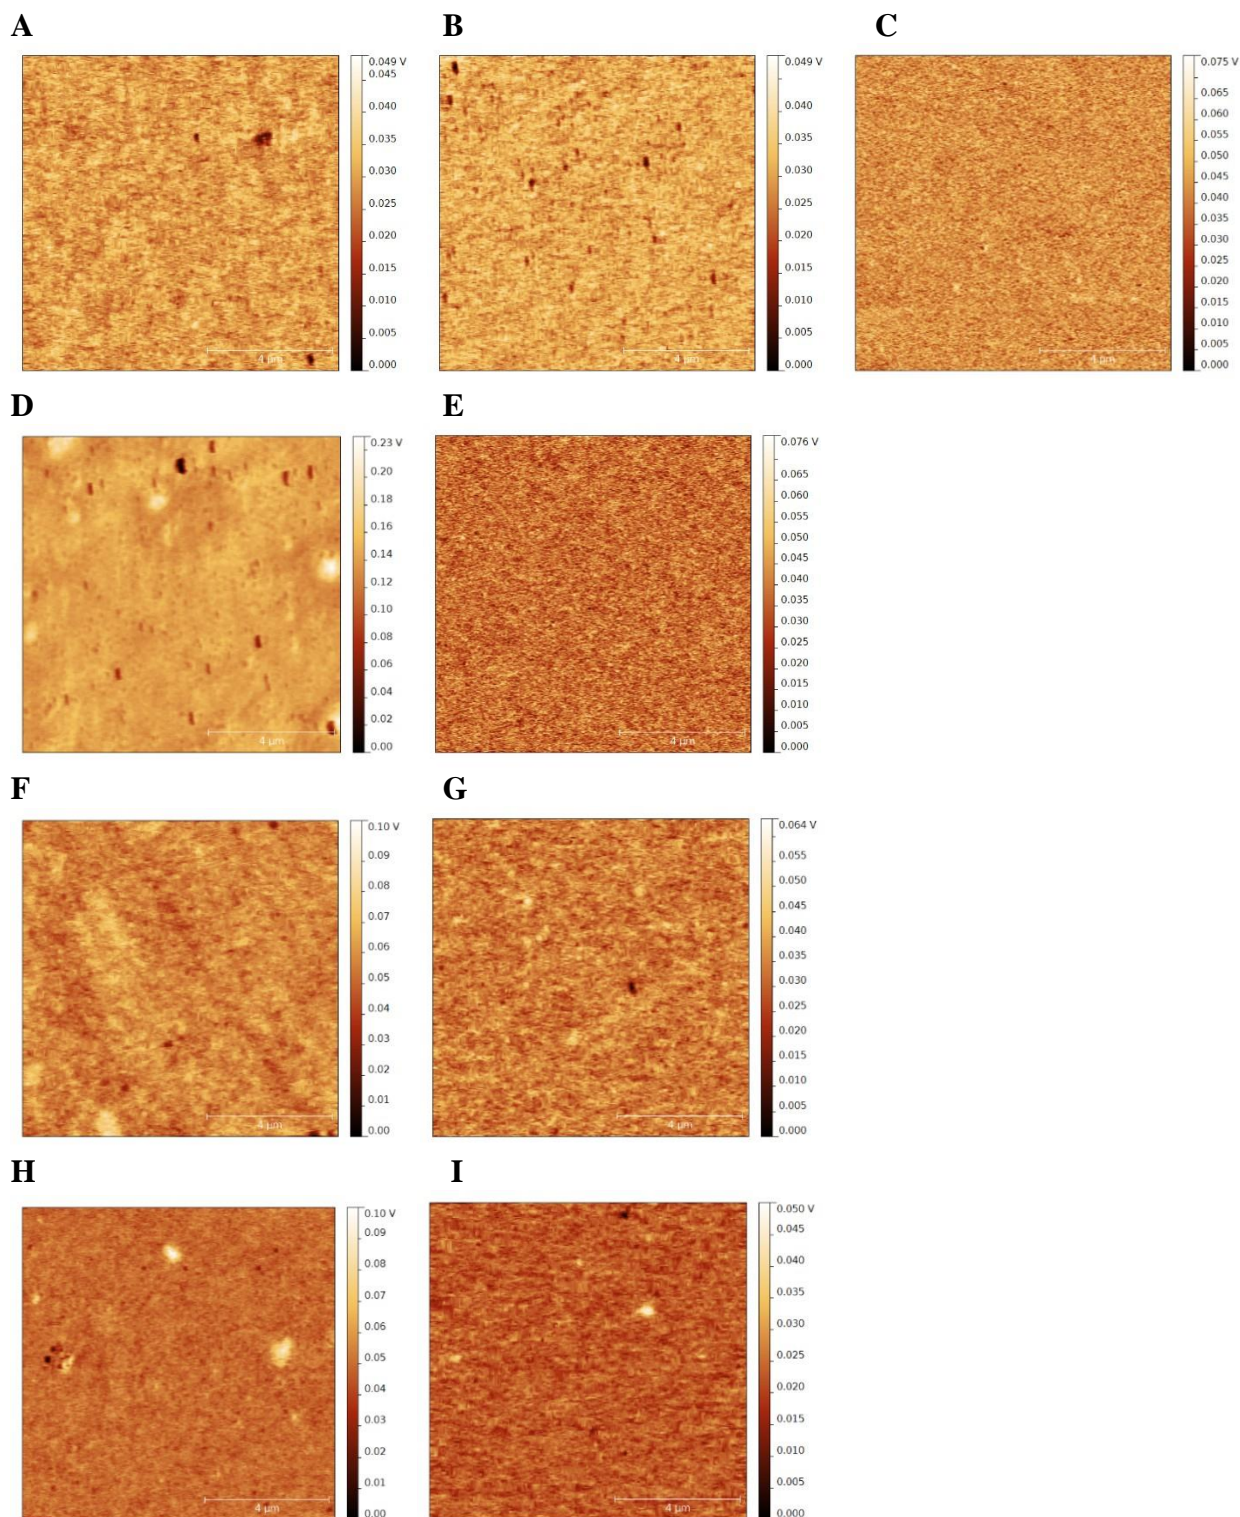

**Figure S5.** Representative KPFM surface potential images for BSA immobilized on a negatively-charged sensor surface (A) and positively-charged surface (B), lysozyme on a – surface (C), ubiquitin on a – surface (D) and + surface (E), *E. coli* protein extracts on a – surface (F) and + surface (G), and *P. fluorescens* protein extracts on a – surface (H) and + surface (I). The potential values corresponding to the color gradient are relative values with the zero threshold set individually for each image by the analysis software. The scale bars show 4 μm lengths. KPFM imaging was conducted under dry ambient conditions.

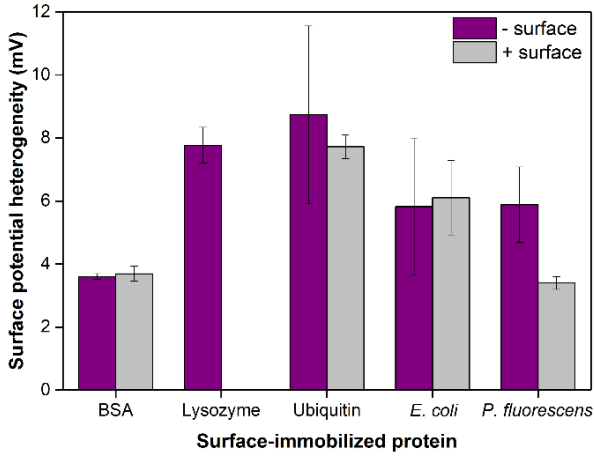

**Figure S6.** Surface potential variability of model and extracted proteins adsorbed on negatively- or positively-charged sensor surfaces. The variability was calculated as the RMS value of KPFM potential images. Lysozyme only adsorbed onto negatively-charged sensor surfaces; as such, no data were collected for positively-charged surfaces. Error bars indicate the standard deviations of the RMS values from at least five KPFM images.

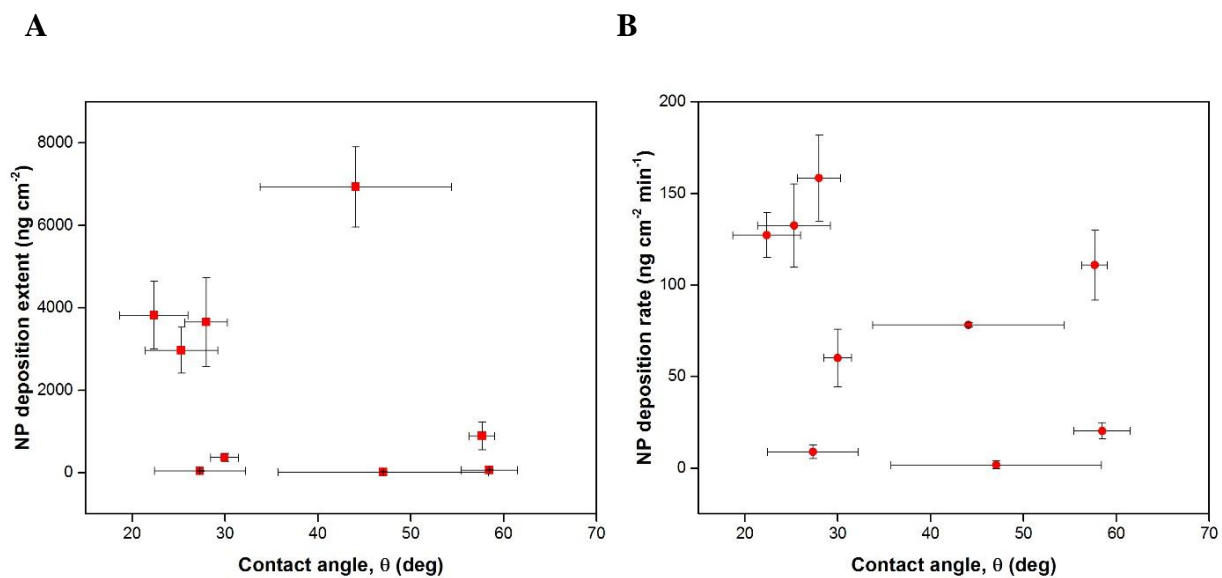

**Figure S7.** Correlations between contact angles of surface-immobilized protein layers and hematite NP deposition extents (A) and rates (B). Error bars indicate the standard deviations of at least triplicate measurements.
